# Supplementary material
Source: publisher figshare collection journal article supplement (https://frontiersin.figshare.com/ndownloader/files/11307809)
Supplement: Supplementary file [file 11307809]

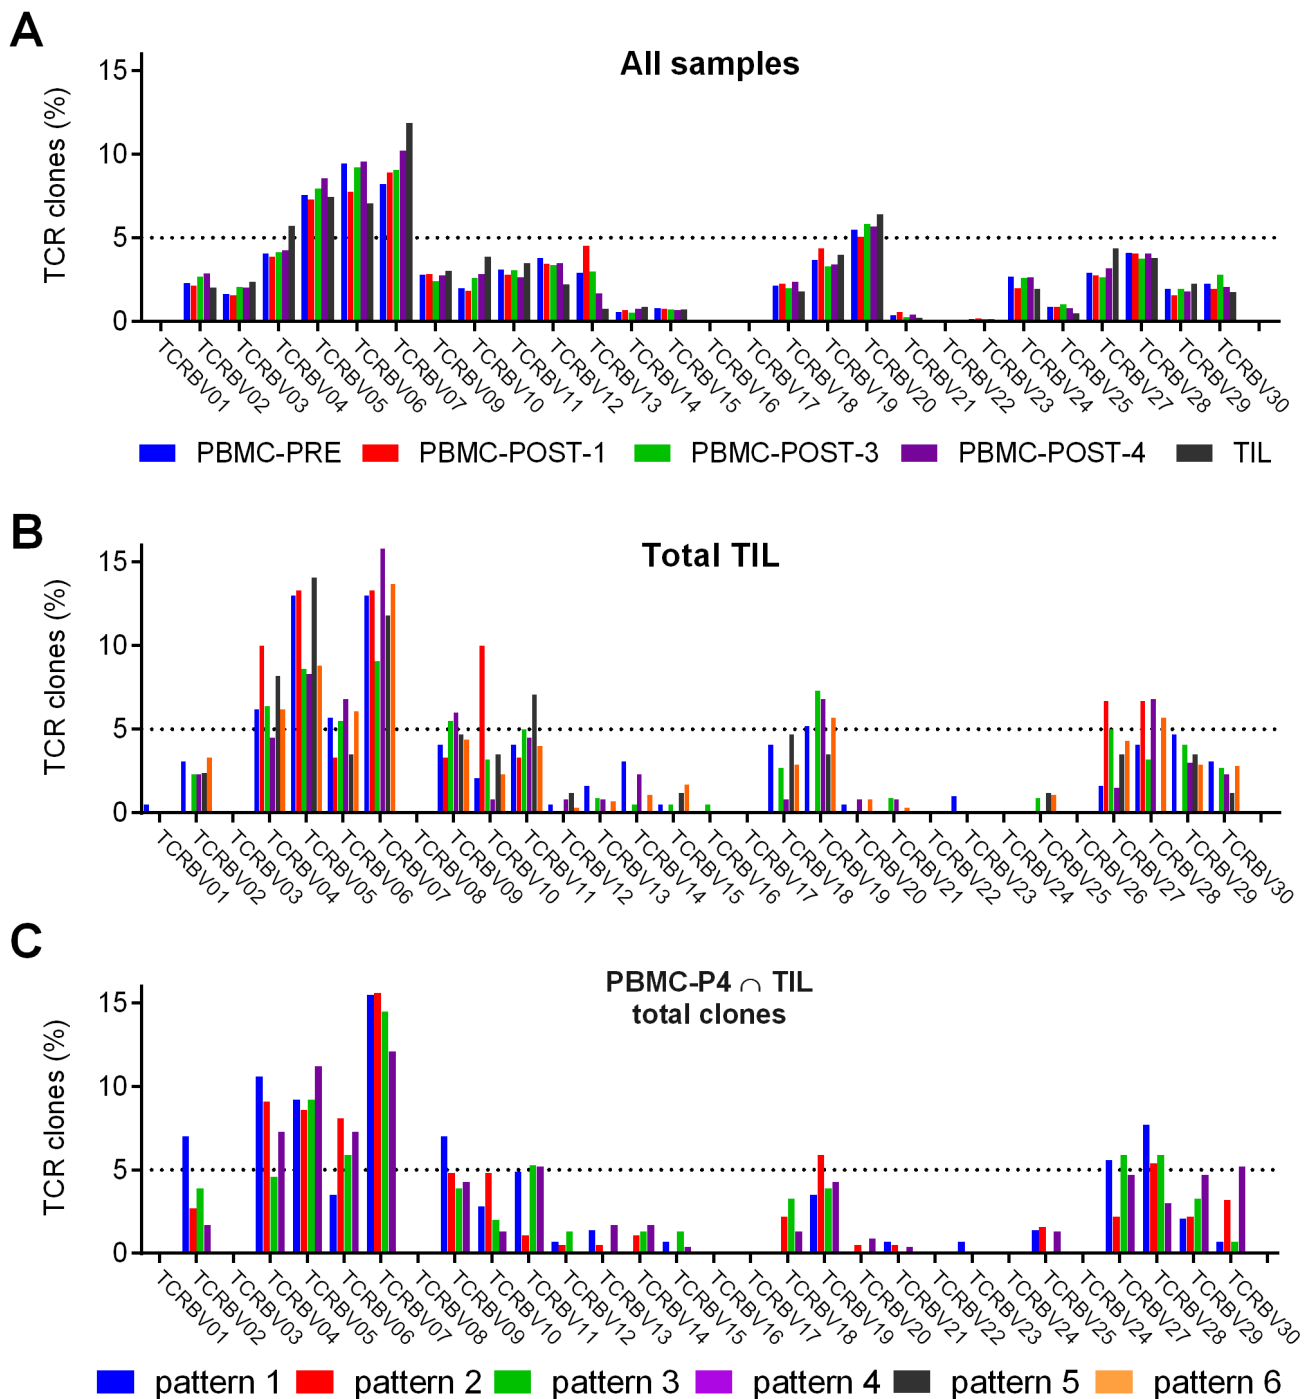

**Supplementary Figure 4. V $\beta$  gene usage of the TCR $\beta$  (TCR $\beta$ ) repertoire.** (A) Distribution of V $\beta$  gene usage of T cell clones from all samples analysed (sum of productive frequencies). (B) V $\beta$  gene usage of TIL clones (n=1382) regarding their distribution patterns (frequency). (C) V $\beta$  gene usage of TIL clones (n=706) that persisted in the follow-up sample (PBMC-POST-4  $\cap$  TIL) regarding their distribution patterns (frequency). Samples: PBMC-PRE, PBMC-POST-1, PBMC-POST-3, PBMC-POST-4, TIL. *Patterns*: 1, present at baseline, increases in time; 2, absent at baseline, increases in time; 3, absent at baseline, detected at POST-4 sample; 4, present at baseline, decreases in time; 5, present at baseline, absent in time; 6, absent at blood, present in tumour.
